RESEARCH ARTICLE

# Enhancing the Biodiversity of Ditches in Intensively Managed UK Farmland

Rosalind F. Shaw<sup>1\*</sup>, Paul J. Johnson, David W. Macdonald, Ruth E. Feber

Wildlife Conservation Research Unit, Department of Zoology, University of Oxford, Recanati-Kaplan Centre, Tubney House, Tubney, Oxon, United Kingdom

✉ Current address: Environment and Sustainability Institute, University of Exeter, Cornwall Campus, Penryn, Cornwall, United Kingdom

\* [r.shaw@exeter.ac.uk](mailto:r.shaw@exeter.ac.uk)

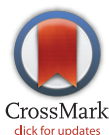

## OPEN ACCESS

**Citation:** Shaw RF, Johnson PJ, Macdonald DW, Feber RE (2015) Enhancing the Biodiversity of Ditches in Intensively Managed UK Farmland. PLoS ONE 10(10): e0138306. doi:10.1371/journal.pone.0138306

**Editor:** Christopher A. Lepczyk, University of Hawaii at Manoa, UNITED STATES

**Received:** December 31, 2014

**Accepted:** August 28, 2015

**Published:** October 7, 2015

**Copyright:** © 2015 Shaw et al. This is an open access article distributed under the terms of the [Creative Commons Attribution License](https://creativecommons.org/licenses/by/4.0/), which permits unrestricted use, distribution, and reproduction in any medium, provided the original author and source are credited.

**Data Availability Statement:** All relevant data are within the paper and its Supporting Information files.

**Funding:** This study was funded by the Esmée Fairbairn Foundation grant number EN/09-2528. The funders had no role in study design, data collection and analysis, decision to publish, or preparation of the manuscript.

**Competing Interests:** The authors have declared that no competing interests exist.

## Abstract

Drainage ditches, either seasonally flooded or permanent, are commonly found on intensively managed lowland farmland in the UK. They are potentially important for wetland biodiversity but, despite their ubiquity, information on their biodiversity and management in the wider countryside is scarce. We surveyed 175 ditches for their physical and chemical characteristics, spatial connectivity, plant communities and aquatic invertebrates in an area of intensively managed farmland in Oxfordshire, UK and collected information on ditch management from farmer interviews. Water depth and shade had a small impact on the diversity of plant and invertebrate communities in ditches. Increased shade over the ditch channel resulted in reduced taxonomic richness of both channel vegetation and aquatic invertebrates and channel vegetation cover was lower at shaded sites. Invertebrate taxonomic richness was higher when water was deeper. Spatial connectivity had no detectable impact on the aquatic invertebrate or plant communities found in ditches. The number of families within the orders Ephemeroptera, Plecoptera and Trichoptera (EPT), which contain many pollution-sensitive species, declined with decreasing pH of ditch water. As time since dredging increased, the number of EPT families increased in permanent ditches but decreased in temporary ditches. Whether or not a ditch was in an agri-environment scheme had little impact on the reported management regime or biodiversity value of the ditch. Measures for increasing the amount of water in ditches, by increasing the water depth or promoting retention of water in ditches, could increase the biodiversity value of ditches in agricultural land. Some temporary ditches for specialised species should be retained. Reducing the amount of shade over narrow ditches by managing adjacent hedgerows is also likely to increase the species diversity of plant and invertebrate communities within the ditch. We recommend that to preserve or enhance the biodiversity value of ditches, and improve their ecosystem service delivery, management prescriptions for hedgerows adjacent to ditches should differ from those aimed at hedgerows only.

## Introduction

Where landscapes are dominated by agriculture, semi-natural areas provide critical habitat for biodiversity in an otherwise inhospitable matrix (e.g. [1]). Wetland areas on farmland are increasingly recognised as being important for wildlife, and their loss has been implicated in the decline of some formerly widespread species [2]. Wetland habitats that have been lost in the UK and across Europe include wet rough pasture or marsh, ponds, and small linear features such as ditches [3,4]. Small wetland habitats (both artificial and natural) within agricultural land have been demonstrated to contribute to regional diversity levels [5].

Agri-environment schemes (AES) are currently the most widely applied policy mechanism aimed at halting or reversing the well documented declines of many farmland species [6,7,8]. They provide financial support for farmers and land managers to undertake a range of wildlife-friendly management measures. However, while AES are benefitting some species and habitats [9], others are still faring badly [10]. Given the continuing declines in farmland species, and the cost of AES (for example, approximately £400 million per year is paid to English farmers under AES [11]), improving their effectiveness for biodiversity conservation is a high priority [12]. Recent work has highlighted the need for better assessments of the importance of different habitat features and how to manage them (e.g. [13]).

While a large body of information exists on the biodiversity and management of many semi-natural habitats in farmland, such as field margins and hedgerows, others, particularly small freshwater bodies, remain neglected [14]. Despite having been replaced by sub-surface drainage in some areas [4], ditches are still widespread in agricultural land. As linear wetland areas, they provide very different habitat compared to other farm habitats and are particularly important for aquatic plants [15], aquatic invertebrates [14,16] and amphibians [17]. These groups are also rather poorly studied on farmland, yet contribute to overall species diversity at local and landscape scales [5]. Ditches and their margins may also function as corridors within the landscape for other groups, including pollinators [18] and small mammals [19].

In addition to providing wildlife habitat, ditches supply other ecosystem services such as diffuse pollution mitigation [20]. Both permanent and temporary ditches are often the first concentration point of water draining from agricultural land. The Water Framework Directive of the European Union requires member states to have all surface water bodies in 'good' ecological and chemical condition by 2015 [21], and ditches have the potential to reduce the amount of chemicals and sediment entering the wider water catchment [22]. By retaining water across the wider landscape in times of high flow, ditch management may reduce flood risk [22]. Sutherland *et al.* [23] suggest that policy and economic incentives could be used to help maximize achievement of these interlocking objectives: restoring flood plain wetlands, creating riparian corridors, improving in-channel habitat and creating flood retention basins to improve ecological status, reduce flood risk, and deliver biodiversity targets.

The biodiversity of ditches is likely to be affected both by their management and their connectivity to other wetland habitats within the landscape. To maintain their drainage function, ditches require management, particularly removal of vegetation and accumulated sediments to allow water in the ditch to flow. The frequency of ditch management has significant impacts on the vegetation and invertebrate fauna, with intermediate frequency of management commonly having the most positive impacts [24,25,26]. The impacts of management on biodiversity may be mediated by the level of connectivity of the ditch. For example, recolonisation of cleaned ditches may be quicker if they are connected to a source of colonisers (plant diversity of ditch banks has been shown to decrease with distance from a seed source [27]). Environmentally sensitive management of ditches includes reducing the frequency of cleaning and preventing

the application of agro-chemicals close to banks [28]. However, some management is usually required, with infrequent management leading to loss of species diversity [25].

Well connected ditches have been shown to have higher species richness (e.g. [27,29]). Temporal as well as spatial connectivity influences aquatic communities. In ditches which dry out regularly, recolonisation can occur from sediments [30], or active or passive dispersal from other areas. Conversely, rapid changes in flow rate in ditches closely connected to main water-courses may have a negative impact on species richness [31]. Connectivity can have implications for the spread of invasive species if, for example, increased connectivity means that water bodies are more likely to be invaded [32].

Much of the information on the biodiversity of ditches has come from permanently wet (e.g. [33,34] ditches or those of high conservation value [25,35,36]. Despite this, small ditches surrounding fields are common in some regions of Europe [4] and North America [37]. In the UK, there are few data on ditches in agricultural land in landscape types other than fenland and river flood plains [38]. Ditches in intensively managed agricultural land are widespread throughout the UK—average UK ditch density is c. 2km per km<sup>2</sup> [38]. The relative lack of information on the biodiversity of smaller, temporary ditches, which are widespread in farmland [14], may lead to lost opportunities for increasing the value of this habitat to farmland biodiversity. This is particularly important as the combined ditch and hedge management option in England's Entry Level agri-environment scheme (ELS) is one of the most frequently selected. Ditches are eligible for management under ELS only if they contain plants considered typical of wet ditches and farmers receive payments to ensure that these ditches are cleaned less than once per agreement (5 years), and the vegetation cut not more than once every 2 years [39]. In 2009, 43,430km of ditches were managed under ELS [11] and maximising the biodiversity of these is highly desirable.

The aim of this study was to improve knowledge of agricultural ditches using data from a survey of plants and invertebrates in permanent and temporary ditches across multiple farms in intensively managed agricultural land. We investigated the impacts of physical and chemical characteristics, including water quality, the size of the ditch, the bank angle and surrounding land use (which have been demonstrated to be important in other ditch systems e.g. [26,40,41,42]), on biological communities. We also investigated whether management, both vegetation cutting and dredging of the ditch and management of associated features such as hedges, had any effect on ditch communities. Management of ditches can be affected by participation in agri-environment schemes, so we established whether farms or individual ditches were entered into these schemes. We investigated these factors in seasonal and permanent ditches, and in ditches with differing spatial and temporal connectivity across the landscape. We predicted that ditches with a higher proportion of agricultural land surrounding them would have lower biodiversity but that this impact may be mitigated by the presence of associated features such as margins and hedges. We also predicted that ditches with more frequent management would have lower biodiversity but that ditches with greater temporal and spatial connectivity would have greater biodiversity. We also asked whether ditches managed under agri-environment schemes had greater biodiversity than those not in agri-environment-schemes.

## Materials and Methods

### Site Selection

Ditches were defined as man-made channels, primarily for agricultural purposes which usually have a linear planform, follow linear field boundaries, and show little relationship to natural contours (following [16]). The study area was the Upper Thames region (northern extent

51.980024°, -1.2789423°, southern extent 51.6642°, -1.495128°, eastern 51.690568°, -1.6601901°, western 51.716468°, -0.96372977° DD) which represents pre-Quaternary clay landscapes with some river floodplain areas [38]. Farms were randomly selected using post-codes (<http://www.yellowpages.com/>) to obtain farmer contact details. Sixty-five farmers were contacted. Of these, 18% did not have ditches and 11% did not want to participate, resulting in 175 ditches from 30 farms being included in the survey. Ditches included in the study ranged from narrow temporary ditches, to large ditches which contained water all year (see Table 1 and Table 2). All ditches had been dug as drainage ditches and most were more than 45 years old.

## Ditch selection and survey

For recording local factors such as aspect and immediate land use, ditches were defined as ending at a junction with another ditch, other linear feature (e.g. hedgerows), or drainage pipe. The number of ditches surveyed per farm ranged from 1 to 14, (mean  $5.8 \pm 2.77$  SD). If farms contained fewer than six ditches, all were surveyed. If the farm had more than six ditches, ditches were selected at random (if they appeared homogenous) or selected to cover the range of ditch types on that farm. All ditches were surveyed for physical and chemical characteristics, and bank and channel plant communities (see below). A subset of ditches that were at least partially wet at the time of survey was sampled for aquatic invertebrates.

## Physical and chemical characteristics of ditches

Ditches in our study differed from each other in terms of length and width, which could affect their biodiversity. We therefore measured ditch length, bottom width and bank top width and used the formula for a trapezoid area multiplied by the length to estimate ditch volume (ditches tend to be more consistent than natural watercourses in channel shape).

Bank angle was estimated using a clinometer. A spatial connectivity index was calculated (number of spatial connections at the end of each ditch multiplied by a qualitative score for each connection type: 0 = earth bank, 1 = connected by a culvert or pipe to another ditch, 2 = connected directly to another ditch, stream or river). Although coarse, this method was

**Table 1. Physical and chemical characteristics of surveyed ditches.**

| Characteristic                                   | Mean ( $\pm$ SD)    | Range (n)        |
|--------------------------------------------------|---------------------|------------------|
| Ditch length (m)                                 | 288.4 $\pm$ 166.23  | 28–1292 (175)    |
| Bottom width (m)                                 | 0.98 $\pm$ 0.564    | 0.25–4.5 (175)   |
| Bank top width (m)                               | 3.49 $\pm$ 1.55     | 0.9–11 (175)     |
| Bank angle (degrees)                             | 41.1 $\pm$ 9.47     | 9–80 (349)       |
| Water depth (m)                                  | 0.07 $\pm$ 9.77     | 0–1 (175)        |
| Freeboard (m)                                    | 0.84 $\pm$ 0.34     | 0.03–1.65 (175)  |
| pH                                               | 7.9 $\pm$ 0.43      | 6.04–9.05 (270)  |
| Conductivity ( $\mu$ S)                          | 858.00 $\pm$ 410.30 | 210–3924 (294)   |
| Nitrate (mg/L nitrate-nitrogen)                  | 3.02 $\pm$ 3.47     | 0–17.5 (243)     |
| Phosphate (mg/L)                                 | 2.01 $\pm$ 3.46     | 0.01–29.15 (245) |
| Number of spatial connections                    | 3.64 $\pm$ 1.82     | 0–10 (173)       |
| Amount of shade (%): Ditch bank with hedge       | 61.1 $\pm$ 29.5     | 0–100 (129)      |
| Amount of shade (%): Ditch bank without hedge    | 15.8 $\pm$ 24.7     | 0–90 (192)       |
| Amount of shade (%): Ditch channel with hedge    | 38.1 $\pm$ 32.2     | 0–95 (141)       |
| Amount of shade (%): Ditch channel without hedge | 21.1 $\pm$ 31.5     | 0–90 (31)        |

doi:10.1371/journal.pone.0138306.t001

**Table 2. Connectivity, land use and management of ditches.** Participation in agri-environment schemes (AES) includes Entry Level Stewardship Schemes (ELS), Higher Level Stewardship Schemes (HLS) and Environmentally Sensitive Areas (ESA) (<http://www.naturalengland.org.uk/ourwork/farming/funding/default.aspx>)

| Characteristic                                                                    | Category                                         | Number of ditches |
|-----------------------------------------------------------------------------------|--------------------------------------------------|-------------------|
| Temporal connectivity (from farmer interviews)                                    | Wet after heavy rain                             | 17                |
|                                                                                   | Winter wet and wet after heavy rain              | 59                |
|                                                                                   | Winter wet                                       | 37                |
|                                                                                   | Wet all year                                     | 61                |
| Land use surrounding ditch                                                        | Predominantly arable                             | 71                |
|                                                                                   | Predominantly pasture                            | 63                |
|                                                                                   | Mixed (arable, pasture)                          | 33                |
|                                                                                   | Woodland                                         | 5                 |
| Number of ditches with associated features                                        | Hedgerow                                         | 154               |
|                                                                                   | Field margin ( $\geq 3\text{m}$ ) on one side    | 63                |
|                                                                                   | Field margin ( $\geq 3\text{ m}$ ) on both sides | 41                |
| Participation in AES (numbers of farms with ditch option selected in parentheses) | ELS                                              | 19 (6)            |
|                                                                                   | HLS                                              | 3 (1)             |
|                                                                                   | ESA                                              | 1 (0)             |
|                                                                                   | NO AES                                           | 7                 |

doi:10.1371/journal.pone.0138306.t002

used because mapping the number of ditches within a radius of the study ditch might not represent whether the study ditch was actually connected to any of the other ditches in the network and, furthermore, minor ditches are not always mapped. Each ditch was assigned to a temporal connectivity category based on the reported perception of the land manager. The categories recognised were wet all year (permanent), wet during winter and after heavy rain, wet during winter, or wet after heavy rain. Presence and width of uncropped or fenced field margins (alongside the ditch and abutting the ditch bank) were recorded, together with the percentage of each bank length with a hedge. The percent shade from woody vegetation was estimated as the percentage of bank or channel that would be shaded if the sun was directly overhead, during the summer surveys (i.e. with full foliage). Water depth, pH and conductivity were recorded on each of three visits (summer 2010, winter-spring 2011, summer 2011) and averaged before inclusion in analysis. The pH and conductivity were measured in the field using a multiparameter tester (Hanna Instruments, UK), and water samples were taken, frozen within 8 hours and analysed for nitrate (cadmium reduction method) and phosphate (ascorbic acid method), on an environmental bench photometer (Hanna Instruments, UK). Samples were tested in duplicate. If two samples gave readings that differed by  $>10\%$  it was considered that there was a replication error and the analysis was repeated. The mean result from the three sampling periods was used in the analyses.

## Local land use and ditch management

Farmers participating in the ditch survey were interviewed in person between February and April 2011. Farmers were asked if they had an AES agreement, and whether it included options related to ditch management. For each ditch, farmers were asked: its age and purpose; if the ditch was managed under an AES; when the ditch vegetation was last cut; when the ditch was

last dredged; and if any other management had been applied. For adjacent hedges, the time since cut was recorded. [S1 Table](#) gives full details of the questions asked. Land use (arable, here defined as annual crops; pasture, both temporary leys and permanent grassland; woodland or other) on either side of the ditch was recorded in the field, following Palmer *et al.* [43].

## Vegetation surveys

Vegetation surveys were conducted in the summers of 2010 (August-Oct, 86 ditches) and 2011 (late July-Sept, 87 ditches). Percentage cover of higher plant species (following [44]), mosses, liverworts, bare ground and plant litter was estimated by eye along the middle 10 m length of each ditch bank (sloping sides of ditch, above water line if wet) and channel (aquatic or dry base of ditch) using a 10 m measuring tape as a guide.

## Invertebrate surveys

Invertebrate surveys were carried out between May and early July 2011. Sweep netting and timed bank sorting were carried out following the methods of Palmer *et al.* [43]. Sweep netting was also timed (for three minutes) for consistency with Environment Agency methods [45]. Invertebrates were stored in 90% ethanol and identified by APEM Ltd (Stockport, UK), according to Palmer *et al.* [43]. This method involves identifying key groups to species (all aquatic groups excepting Diptera larvae, Oligochaeta and Bivalves). The number of Ephemeroptera, Trichoptera and Plecoptera (EPT) families per ditch were recorded. Many EPT families are pollution sensitive and used for quality assessment of still waters such as ponds and canals [46]. Invertebrate abundance was recorded on a logarithmic scale (1 = 1–9, 2 = 10–99, 3 = 100–999, 4 = 1000+ [43]).

## Statistical analysis

Several measures were used to assess the biodiversity value and habitat quality of ditches: i) taxonomic/ species richness for invertebrate and plant channel communities (for bank vegetation data, the Berger-Parker Index [47] was used as a proxy for taxonomic diversity due to differences in bank width potentially biasing other metrics); ii) habitat quality score of Palmer *et al.* [43] for aquatic plant communities (based on Ellenberg nitrogen indicator values, and indicating the water quality of ditches); iii) number of Ephemeroptera, Trichoptera and Plecoptera (EPT) families per ditch; iv) community assemblages.

The effects of physical and chemical characteristics, spatial connectivity and land use on ditch biodiversity were tested using a set of models based on plausible hypotheses developed from the literature (see [S2 Table](#)). These hypotheses led to the framing of both main effects models to represent factors such as ditch size or the presence of hedge and also models including plausible interaction effects such as those including surrounding land use and the presence of a vegetative field margin. Biodiversity indices were analysed using mixed effects models with maximum likelihood [48] using R software [49]. Models were constructed using Site ID as a random effect to account for similarity among ditches at the same farm. For invertebrate taxonomic richness an offset of the length of ditch sampled was used to account for the survey length being less than 50m in some ditches. Before model fitting, samples with missing values for any predictors were removed. The number of EPT families per ditch was analysed using a generalised linear mixed model with a Poisson distribution (package lme4 [50]). Residuals were checked for normality and the habitat quality score log transformed to an approximately normal distribution.

Model selection procedures [51] were carried out using Akaike's Information Criterion (AIC) adjusted for small samples (AICc) using R package MuMIn [52]. Models with AICc



values that were less than 7.0 greater than that of the best model were considered plausible, provided they were a better fit than the null model [51]. Model averaging was not used due to correlated explanatory variables leading to inflated estimates of parameter standard error. The amount of variation explained by each model was assessed using a likelihood-ratio based pseudo  $R^2$  [52] and  $R^2_{adj}$  following Nagelkerke [53]. Community analysis was carried out using the R Vegan package [54]. Continuous environmental variables (same as those used in taxonomic richness analysis, see S2 Table) were standardized to zero mean and unit variance and response data were Hellinger transformed [55]. Partial redundancy analysis (pRDA) was used to partition variation explained due to explanatory variables, and variation due to the covariables site (farm) and, for vegetation data, quadrat size [56]. These covariables were treated by the pRDA as 'conditioned' variables, with variance explained by these removed, in the multivariate equivalent of a partial regression analysis [55]. For banks, one bank from each ditch was randomly selected for analysis. The pRDA was carried out using the factors included in the taxonomic richness models but without interaction terms. The global model was tested for significance using 999 permutation tests and, if significant, forward stepwise selection using double-stopping criteria was used to select the final model [57]. The  $R^2_{adj}$  were calculated using variance partitioning [58], which aims to separate the variation explained into that explained by the different sets of variables (environmental and conditioned). As the two explanatory datasets are not orthogonal to one another (the variables are inter-correlated), some variation is explained jointly by the explanatory and conditioned variables [55].

The models above suggested both shade and water depth were important environmental predictors. Reasoning that these were plausibly affected by hedgerows, we used them as responses in models with average interval of hedge cutting by the manager and the amount of hedge next to the ditch as predictors using linear mixed effects models (LMMs, R package nlme [48]). Site was entered as a random effect and the average water depth was square root transformed to meet the model assumption that data are normally distributed. The effect of AES status on ditch management (time since dredged and time since vegetation cut) was tested using general linear models with a Poisson distribution. As the majority of sites had only ditches that were managed under AES or ditches that were not managed under AES, site was entered first in the model to account for this variation.

## Ethics Statement

All fieldwork was carried out on private land with permission of the land owner. No protected species or vertebrates were sampled as part of this project. Data collected from farmer questionnaires were anonymised prior to analysis, and informed written consent was received from all questionnaire participants. This study was approved by Oxford University Central University Research Ethics Committee.

## Results

### Factors affecting ditch vegetation

**Bank vegetation.** One hundred and fifty-four ditches were included in the ditch vegetation analyses. Between 2 and 39 plant species were recorded on ditch banks (mean  $12.5 \pm 5.94$  SD). None of the predictor variables explained any of the variation in the Berger Parker index. The vegetation community composition was most strongly affected by shade and the water depth (Table 3), however the amount of variation explained by the environmental variables was low (Table 4). The multivariate analysis showed that shaded ditches had a higher abundance of woodland and hedge ground cover species, such as *Hedera helix* and *Glechoma*

**Table 3. Results from final model in partial redundancy analyses of community data using the final model selected, using forward stepwise selection with double stopping criteria (Blanchet *et al* 2008).** Significance of each term in the final model was tested using 999 permutation tests: a type I test (in sequential order) and type III test (test of marginal significance).

| Community            | Final pRDA model     | Df | Type 1 test<br>Variance | P      | Type III test<br>Variance | P      |
|----------------------|----------------------|----|-------------------------|--------|---------------------------|--------|
| Bank vegetation      | % shade              | 1  | 0.024                   | <0.001 | 0.023                     | <0.001 |
|                      | Water depth          | 1  | 0.011                   | 0.012  | 0.011                     | 0.01   |
|                      | Ditch in AES         | 1  | 0.006                   | 0.420  | 0.006                     | 0.448  |
|                      | Bank slope           | 1  | 0.008                   | 0.113  | 0.008                     | 0.087  |
| Channel vegetation   | Water depth          | 1  | 0.008                   | <0.001 | 0.008                     | 0.005  |
| Aquatic invertebrate | pH                   | 1  | 0.027                   | <0.001 | 0.021                     | 0.015  |
|                      | Water depth          | 1  | 0.015                   | 0.091  | 0.012                     | 0.390  |
|                      | Dredged              | 1  | 0.015                   | 0.091  | 0.018                     | 0.020  |
|                      | Conductivity         | 1  | 0.018                   | 0.028  | 0.0126                    | 0.054  |
|                      | Phosphate            | 1  | 0.016                   | 0.054  | 0.012                     | 0.240  |
|                      | % shade + % shade sq | 1  | 0.020                   | 0.006  | 0.022                     | 0.010  |
|                      | % arable             | 1  | 0.013                   | 0.172  | 0.013                     | 0.200  |
|                      | Ditch in AES         | 1  | 0.013                   | 0.294  | 0.012                     | 0.310  |
|                      | Nitrate              | 1  | 0.013                   | 0.166  | 0.013                     | 0.320  |
|                      |                      |    |                         |        |                           |        |

doi:10.1371/journal.pone.0138306.t003

**Table 4. Amount of variation explained by environmental (Env) and conditioned (Site and Quadrat Size) variables in the partial redundancy analyses of the bank vegetation community, channel vegetation community and aquatic invertebrate community (see Table 3 for environmental factors included in final models, conditioned variables were always site and quadrat).** Conditioned variables are treated as covariates and held constant whilst investigating the amount of variation accounted for by explanatory variables. Some variation is explained jointly by environmental and conditioned data sets (cannot be attributed to either data set) as they are not orthogonal [55].

|                            | Bank vegetation community | Channel vegetation community | Aquatic invertebrate community |
|----------------------------|---------------------------|------------------------------|--------------------------------|
| Env adj                    | 0.07                      | 0.04                         | 0.11                           |
| Site adj                   | 0.07                      | 0.10                         | 0.08                           |
| Env + Site joint variation | 0.02                      | 0.01                         | 0.04                           |
| Quadrat Size               | 0.004                     | 0.01                         | NA                             |
| Unexplained variation      | 0.86                      | 0.88                         | 0.77                           |

doi:10.1371/journal.pone.0138306.t004

*hederacea* (Fig 1a). Increased water depth was associated with the presence of species such as *Glyceria maxima* and *Phalaris arundinacea*.

**Channel vegetation.** The number of plant species found in the ditch channel varied between 1 and 15 (mean  $5.4 \pm 3.10$  SD). The best fitting model demonstrated that greater shade was associated with reduced plant species richness (parameter estimate  $-0.026 \pm 0.0072$  SE, Fig 2, Table 5). The second best fitting model included the amount of shade as a quadratic term. The amount of variation explained by all variables was low (global model  $R^2_{adj}$  0.19, see S2 Table for variables included), as was the amount of variation explained by the highest ranked model ( $R^2_{adj}$  0.08, Table 5). The mean Habitat Quality Score of wet ditches was  $1.3 \pm 0.33$  SD. There was no evidence for any impact of the predictor variables tested on the habitat quality score.

The channel vegetation community composition was affected by water depth (Fig 1b). The amount of variation explained by the final model was very low ( $R^2_{adj}$  0.04), as was the amount explained by site (Table 4). Ditches with greater water depths were associated with species more characteristic of open water such as *Lemna minor*.



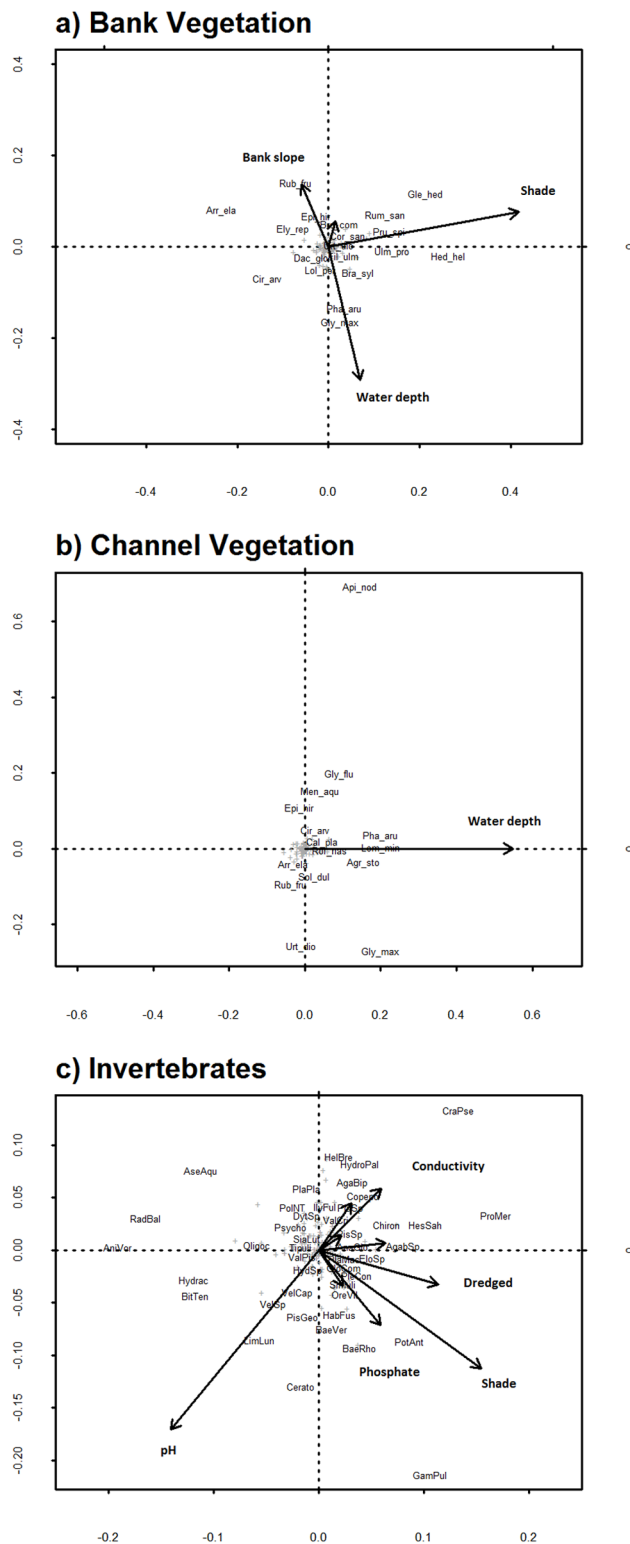

**Fig 1. Correlation biplots from the final partial RDA models showing species and explanatory variables for a) bank vegetation b) channel vegetation and c) aquatic invertebrates.** In a) shade was entered as a quadratic term. Species codes consist of [first 3 letters of genus name]\_ [first 3 letters of species name], see [S1 Dataset](#) for full taxonomic names.

doi:10.1371/journal.pone.0138306.g001

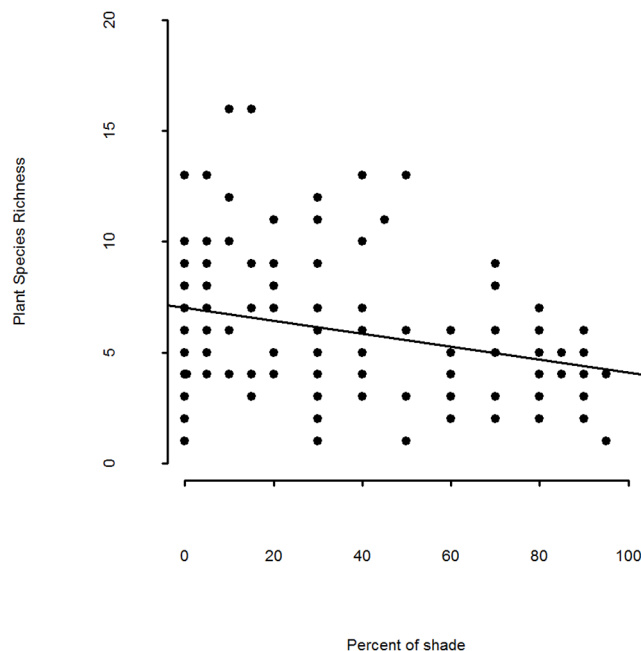

**Fig 2. Species richness of aquatic plants per 10 m length of ditch bank plotted against percentage shade over ditch channel.** Regression line fitted from a simple linear model of predictor plotted against response without random effects.

doi:10.1371/journal.pone.0138306.g002

## Aquatic invertebrates

Of the surveyed ditches, 49 were wet at the time of the aquatic invertebrate survey. From these ditches, 190 invertebrate taxonomic groups were identified, and taxonomic richness varied between 9 and 35 per ditch (mean  $19.6 \pm 5.76$  SD). The ditches surveyed did not cover the full range of temporal connectivity (there was only one ditch which the farmer considered to be

**Table 5. Model selection table from analyses with response variables i) Channel vegetation species richness; ii) Invertebrate taxonomic richness and iii) Number of Ephemeroptera, Plecoptera and Trichoptera (EPT) families per ditch.** Only models which were a better fit than the null model are listed.

| Response variate                      | Model                                                           | (Intercept) | df | logLik   | AICc    | delta | weight | Rsqr  | RsqrAdj |
|---------------------------------------|-----------------------------------------------------------------|-------------|----|----------|---------|-------|--------|-------|---------|
| i) Channel plant species richness     | Percent shade over channel                                      | 7.28        | 5  | -376.31  | 763.02  | 0     | 0.53   | 0.08  | 0.08    |
|                                       | Percent shade over channel + Percent shade over channel squared | 7.10        | 6  | -375.40  | 763.38  | 0.36  | 0.44   | 0.09  | 0.09    |
|                                       | Percent arable + Percent hedge + total margin width             | 8.47        | 11 | -373.91  | 771.68  | 8.66  | 0.007  | 0.11  | 0.11    |
| ii) Invertebrate taxonomic richness   | Average water depth                                             | 14.416      | 5  | -124.795 | 261.257 | 0.000 | 0.422  | 0.178 | 0.179   |
|                                       | Percent shade over channel                                      | 16.802      | 5  | -126.119 | 263.904 | 2.646 | 0.112  | 0.125 | 0.125   |
|                                       | Percent arable                                                  | 14.188      | 5  | -126.533 | 264.733 | 3.475 | 0.074  | 0.107 | 0.108   |
| iii) Number of EPT families per ditch | Average pH                                                      | -16.67      | 4  | -30.45   | 69.88   | 0.00  | 0.52   | 0.26  | 0.33    |
|                                       | Dredged + Temporal connectivity                                 | -0.75       | 6  | -28.12   | 70.39   | 0.51  | 0.40   | 0.33  | 0.41    |
|                                       | Time since dredged                                              | -1.72       | 4  | -34.23   | 77.44   | 7.56  | 0.01   | 0.13  | 0.16    |
|                                       | Post hoc model -pH + Dredged + Temporal connectivity            | -10.35      | 7  | -25.59   | 68.12   | 0     | 0.56   | 0.40  | 0.50    |

doi:10.1371/journal.pone.0138306.t005

winter wet only, and no ditches categorised as wet after heavy rain were wet at the time of survey). Ditches were therefore grouped into permanent ditches (wet all year) and temporary ditches (all other categories). The model with the best fit to the data contained average water depth (Table 5) indicating that taxonomic richness increased with water depth (parameter estimate  $19.9 \pm 6.14$  SE,  $R^2_{\text{adj}} = 0.179$ , Fig 3a). The second best fitting model had considerably lower weight than the first and included percent of the channel shaded (parameter estimate  $-0.09 \pm 0.037$  SE,  $R^2_{\text{adj}} = 0.125$ , Table 5, Fig 3b). The extent of arable land surrounding the ditch had a small negative impact on taxonomic richness (parameter estimate  $-0.04 \pm 0.019$  SE,  $R^2_{\text{adj}} = 0.11$ , Fig 3c). The number of Ephemeroptera, Plecoptera and Trichoptera (EPT) families per ditch was positively associated with increasing pH of the ditch water (parameter estimate  $1.9 \pm 0.58$  SE, Table 5, Fig 4a). A very similar model in terms of fit and explanatory power included temporal connectivity and time since dredged. Temporary ditches had lower numbers of EPT families as time since dredging increased, whereas permanent ditches had higher numbers of EPT families as time since dredging increased (parameter estimate interaction term  $0.13 \pm 0.04$  SE, Fig 4b). A post-hoc model including terms from the best two models had an  $R^2_{\text{adj}}$  of 0.50 (Table 5).

The global model for the invertebrate community analysis had an  $R^2_{\text{adj}}$  of 0.15. Variance partitioning indicated that the variation explained solely by the environmental variables selected using forward selection was 0.11 ( $R^2_{\text{adj}}$ ), while the additional variation explained by these variables but which could not be attributed to either owing to their inter-correlation was 0.04  $R^2_{\text{adj}}$ . Three factors were statistically significant predictors of the invertebrate community (Table 3, Fig 1c): pH, conductivity and the amount of shade entered as a quadratic term. Species associated with higher pH included *Limnephilus lunatus* (caddisfly larvae), *Velia* spp (riffle bugs) and Succineidae (amber snail slugs). Those associated with higher shade included *Potamopyrgus antipodarum* (Jenkins spire snail shell), an invasive species in the UK, native to New Zealand (Fig 1a).

## Effects of management on influential environmental predictors

Eighty-eight percent of the ditches in this study had a hedge on one or both banks (Table 1). Ninety-four percent of hedges on ditch banks were sited directly at the top of the ditch bank. On the remaining 6% the hedge was, on average, 0.68m ( $\pm 0.181$  SE) away from the top of the ditch bank. Ditches with a lower proportion of hedge along the bank had lower levels of shade over both the channels and banks (parameter estimate  $0.27 \pm 0.057$  SE,  $F_{1,175} = 22.9$ ,  $P < 0.001$  for channel data,  $0.51 \pm 0.030$  SE,  $F_{1,294} = 285.6$ ,  $P < 0.001$  for bank data). There was no relationship between the frequency of hedge trimming and the amount of shade either for individual banks ( $F_{1,79} = 0.22$ ,  $P = 0.64$ ) or when assessed across the whole channel ( $F_{1,74} = 0.27$ ,  $P = 0.60$ ). There was a negative relationship between the percent of banks with hedge present and the average water depth (parameter estimate  $-0.001 \pm 0.0002$  SE,  $F_{1,125} = 16.2$ ,  $P < 0.001$ ). Increased shade over the channel resulted in a reduction in the percent cover of vascular plant communities (parameter estimate  $-0.57 \pm 0.069$  SE,  $F_{1,139} = 67.4$ ,  $P < 0.001$ ).

## Management of ditches under AES

At three sites, all ditches surveyed were included in an AES, 21 sites had no ditches included in an AES and 5 sites had some ditches managed under an AES and some not. One land manager could not tell us which ditches were managed under an AES agreement. Site (i.e. individual farms and therefore farmers as a fixed effect) had a strong effect on the time since last dredged and since the last vegetation cut. On sites with both AES and non-AES ditches, ditches in AES had been dredged less recently than those not in AES (Table 6, parameter estimate

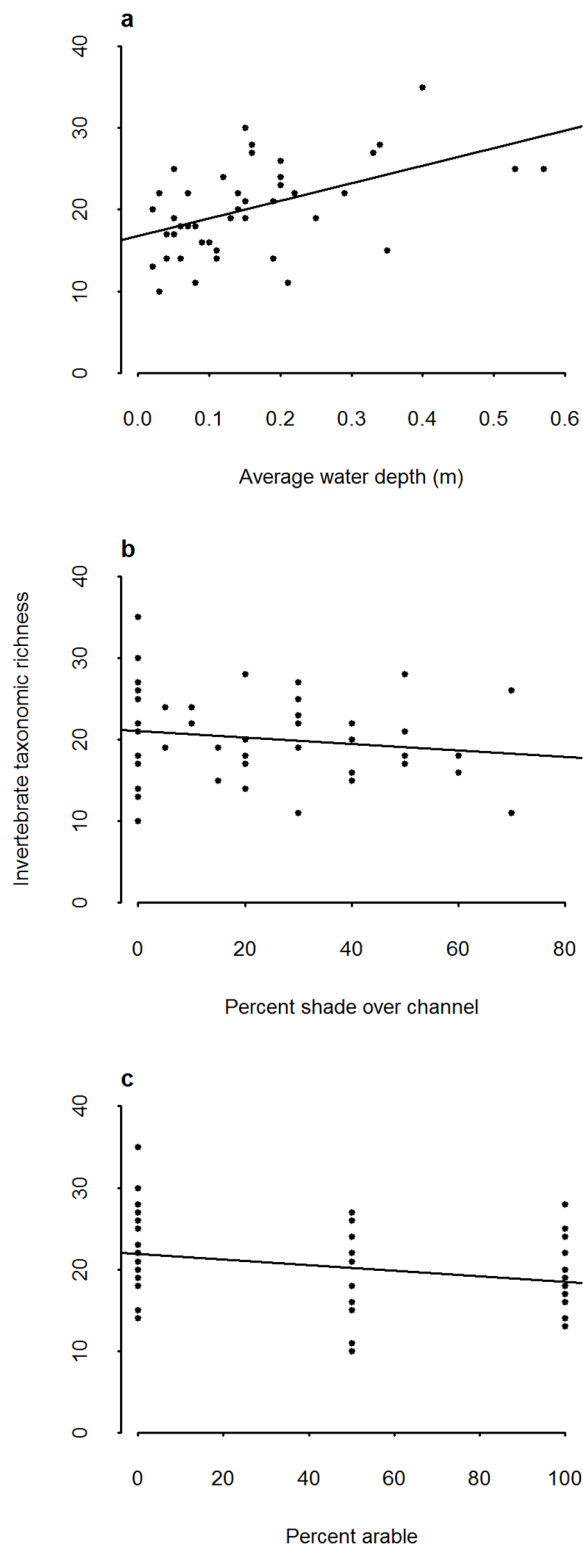

**Fig 3. Invertebrate sample taxonomic richness in relation to a) average water depth b) percent shade over the ditch channel and c) mean taxonomic richness in relation to percent arable land in the surrounding fields.** Regression lines are fitted from a linear model of predictor plotted against response without random effects.

doi:10.1371/journal.pone.0138306.g003

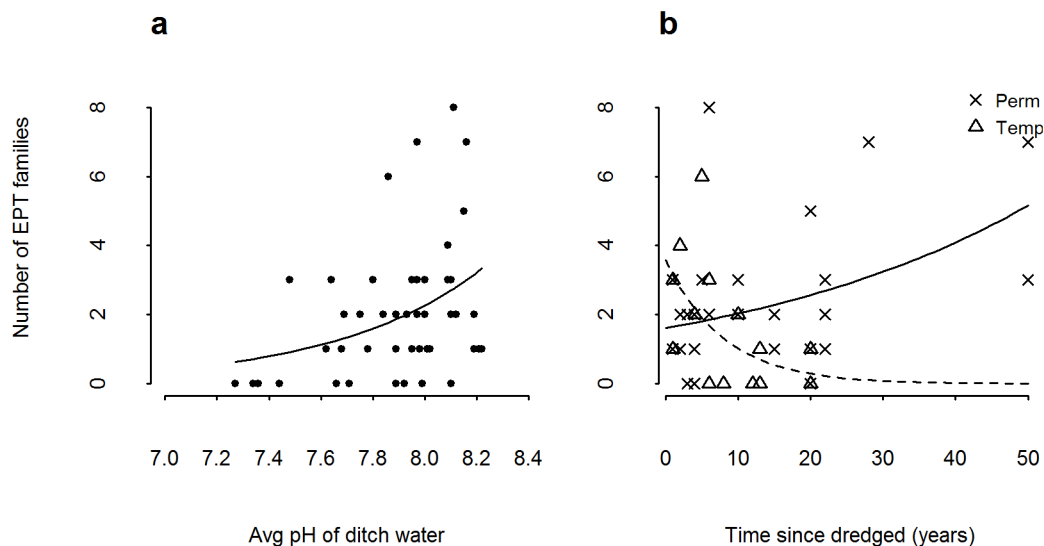

**Fig 4. Number of Ephemeroptera, Plecoptera and Trichoptera (EPT) families per ditch in relation to a) pH and b) temporal connectivity of ditch and time since dredged (black circles and line, permanent ditches, open triangles and dashed line temporary ditches).** Error bars (c) are 95% confidence intervals. Regression lines are fitted from a generalised linear model with poisson distribution of predictor plotted against response without random effects.

doi:10.1371/journal.pone.0138306.g004

**Table 6. Management of ditches in agri-environment schemes (AES) in England (Entry Level Stewardship, Higher Level Stewardship, Environmentally Sensitive Areas, Countryside Stewardship Scheme [38]) and those not in AES.** Data in square brackets beneath are ditches from sites where land managers had both ditches that were managed under AES and those managed outside of AES.

| Management                     | Ditch in AES<br>Mean (years) $\pm$ SD | Range (n)                | Ditch not in AES<br>Mean (years) $\pm$ SD | Range (n)                 |
|--------------------------------|---------------------------------------|--------------------------|-------------------------------------------|---------------------------|
| Time since last dredged        | 14.7 $\pm$ 14.55<br>[10.9 $\pm$ 8.00] | 1–37 (32)<br>[1–28 (25)] | 16.0 $\pm$ 14.74<br>[6.2 $\pm$ 8.12]      | 1–55 (122)<br>[1–28 (12)] |
| Time since vegetation last cut | 3.7 $\pm$ 1.82<br>[5.3 $\pm$ 5.15]    | 1–10 (32)<br>[1–20 (25)] | 9.4 $\pm$ 13.59<br>[6.2 $\pm$ 8.12]       | 0–50 (122)<br>[1–28 (12)] |
| Interval of hedge cutting      | 2.9 $\pm$ 2.35<br>[3.7 $\pm$ 3.09]    | 1–10 (23)<br>[1–10 (13)] | 3.75 $\pm$ 5.33<br>[2.2 $\pm$ 1.79]       | 1–22 (84)<br>[1–5 (5)]    |

doi:10.1371/journal.pone.0138306.t006

$-0.68 \pm 0.164$ ,  $z = -4.161$ ,  $p < 0.001$ ). There was no significant difference in the time since the vegetation was last cut between AES and non-AES ditches, once variation for site had been accounted for (parameter estimate  $-0.03 \pm 0.180$ ,  $z = 0.161$ ,  $p = 0.87$ ).

## Discussion

Numbers of plant species per ditch were lower in this study than those reported from coastal grazing marshes in England and Wales [26], but similar to those reported from a study of ditches across Europe [59]. The Habitat Quality Score of aquatic plant communities in our study was similar to that found in a study of coastal grazing marsh ditches (1.3 in this study, compared to 1.7 in Drake *et al.* [26]). The biodiversity of the invertebrate community was similar to that found in temporary agricultural ditches in Maryland [60] and permanent ditches across Europe [59].

The amount of variation explained by the environmental factors tested was low for most groups. However the amount of shade over the ditch and the water depth had a small but significant effect in several analyses. Both can be influenced by management. Bank vegetation,

when shaded, was dominated by plants typical of woodland communities. The species richness of channel vegetation decreased as the amount of shade over the channel increased. Contrary to expectation, the reported interval between hedge cutting was not related to the amount of shade over the ditch. Two possible reasons for this are, first, that hedges with trees may be less frequently managed but result in patchier (overall lower) levels of shade than frequently trimmed dense shrubby hedges and, second, only the hedge side furthest from the ditch may have been cut (due to restricted access, and to prevent trimmings falling into the ditch). While large amounts of hedge trimmings in ditches are considered undesirable, as they may lead to blockage of ditches during periods of high flow [61], a small amount of woody vegetation in ditches may benefit biodiversity by increasing habitat heterogeneity [62].

Increased water depth had a positive impact on both plants and invertebrates, with more plants considered characteristic of ditches on the banks of wetter ditches (making the ditch eligible for AES funding [39]). Taxonomic richness of both channel vegetation and invertebrates was greater in ditches with greater water depth. The positive impact of water depth on taxonomic richness may have been influenced by the exceptional dryness of the previous year (2009–2010). However, other studies have found that increasing water depth increases ditch vegetation diversity [63] and the abundance of emergent insects [64]. Twisk *et al.* [63] found increasing the water depth was the most cost effective way of improving the diversity of ditch vegetation, although, in water depths above 50–70cm, plant species richness declined due to light limiting conditions. This agrees with our results as, although we found no evidence of a decline, the depth of our deepest surveyed ditch was only 57cm. Deeper ditches are potentially less vulnerable to temperature fluctuations [65], or may have lower nutrient loads [66].

Water depth in ditches can be increased by installing dams or barriers, which can be relatively low cost [22,67]. Recent increased interest in rural sustainable drainage systems indicates that increasing water retention in ditches may have multiple benefits, including mitigating water pollution and retaining water in times of high flow to help prevent flooding in the wider landscape [22]. Previous studies have found no link between species richness and flow control structures, although they may alter invertebrate communities that are highly influenced by flow rates [60]. The implications of alterations of water flow for flooding potential in the fields directly around such features need to be considered: a short study of bunded ditches fitted with overflow pipes found no reduction in yield in the surrounding fields, however it was only assessed in one year [67]. Our research suggests that such schemes may have the potential to increase the biodiversity value of ditches. However, we note that some seasonal ditches may sustain uncommon temporary water invertebrate species that may not be present in any other (permanent) water body type [16]. A further consideration is that increases in water depth, and also reduction in shade, may lead to increases in dominant plant species and eventually result in a decline in biodiversity levels if they are not removed by management [26,63]. Allowing ditches to become shaded may reduce the required frequency of management, but lead to relatively low biodiversity levels [61]. Increasing the water depth and reducing shade may lead to more rapid succession, thus requiring more frequent disturbance through management. This may result in higher biodiversity levels ([68,69] but see [70]). The current recommendations for maintaining ditch biodiversity by using a variety of disturbance levels derive mainly from wet ditches (e.g. [26]) but would apply equally to more temporary ditches if their water depth was increased.

Spatial connectivity of ditches appeared to have little impact on the invertebrate or plant communities found in them; the index of spatial connectivity may have been too coarse to detect any effects. Temporary ditches were found to have lower numbers of EPT families with time since dredging, whereas the opposite was true for permanent ditches. The number of EPT families is used as indication of the pollution level of water bodies, with more EPT families



indicating lower pollution levels. In permanent ditches, dredging is likely to lead to increased sediments in the water and reduced uptake of any pollutants entering the ditch [20,71], which may result in lower numbers of EPT families in ditches as they recover from disturbance. Temporary ditches appeared to have an opposite relationship. The build-up of sediment in temporary ditches due to potentially lower flow rates, and less 'flushing' of the ditch, may mean that ditches which have not been dredged for a long time contain more agrochemical residues. The presence of EPT families is unlikely to be limited by dispersal, due to the mobility of the adult stages.

Land use surrounding the ditch affected the species richness of the invertebrate community, with lower invertebrate taxonomic richness in ditches entirely surrounded by arable land. Ditches closer to nature reserves (the closest bordering nature reserves) in the Netherlands had greater species richness [40], but relatively few studies compare ditches in pasture and cropped arable land [72]. Ditches in arable land are likely to receive higher pesticide load than pastures [38], as well as different nutrient inputs and sediment run off [73]. Agri-environment schemes have, in part, been developed to mitigate for the effects of intensive agriculture. However, there was little evidence from this study that the biodiversity of a ditch was affected by management under an AES agreement, as has also been demonstrated for other AES schemes in Europe [74,75]. There was no difference between vegetation cutting regimes in AES and non-AES ditches in this study (Table 6). Boatman *et al.* [76] found 30% of ELS farmers in England had to reduce the frequency of bank vegetation cutting to meet AES requirements, but only 8% needed to reduce the frequency of dredging. While we found that ditches in AES had been dredged less recently than non-AES ditches on the same site, the mean time since non-AES ditches had been dredged was approximately 6 years. An AES agreement in England currently runs for 5 years, which suggests that a number of these farmers would not have to have reduced the dredging frequency (similar to [76]). Overall, management in this study appeared to be less frequent compared to that recorded for high conservation value ditches in fenland (dredging cycles of 1–4 years and 4–10 years for the Somerset Levels and Broads ESA respectively [77]). Currently, to be eligible for inclusion in AES, ditches are required to contain typical ditch plant communities [39]. In contrast to other linear habitats, such as field margins and hedgerows, which can be created or restored with AES support, there is no provision within the lower tier AES in England for improvement or restoration of ditches [39]. We suggest that, given their importance as habitat for different communities within the landscape, a higher priority should be given to creation and management of small wetland features, such as ditches, within AES.

## Conclusions

Our data suggest that many farm ditches are underperforming in terms of delivering biodiversity benefit, but this could be improved with relatively simple changes in management. Provision of AES options that would allow currently ineligible ditches to be improved would fill one gap. For example ditches without characteristic hydrophilic plants are not eligible for support under AES, but might benefit from directed management to increase the amount of water or reduction of heavy shade from associated hedges. Simple measures such as barriers to increase the amount of water in the ditch may also be beneficial, if appropriate to the ditch and surrounding area [22] and fitted with overflow pipes in case of heavy rain (see [67]). Currently, ecosystem service benefits from a ditch which has a hedge next to it are assumed to be the combined impacts of hedges and ditches [78]. The current English AES framework has existing separate options for ditch management alone, or ditch and hedge combined management [39]. The combined management option for ditches and hedges is similar for these features when they occur on their own. The combined option recommends that hedge trimmings should not

be allowed to fall in the ditch [39]. However, these management options currently do not include information about reducing over-shading from the hedge next to the ditch. Hedges which create a high level of shade over the associated ditch could be cut on the side next to the ditch. The increase in light available to plant communities may result in increased plant biomass and this may lead to increased sedimentation as demonstrated in saltmarsh communities [79]: this may lead to a need to increase the frequency of ditch management to maintain their drainage function. However, this cost to the land manager may be offset by the wider benefit of reduced sediment and potentially agricultural pollutants in water leaving farmland, leading to an improvement in both the biodiversity value of ditches and improvement in the quality of surface waters.

## Supporting Information

**S1 Dataset.** Excel file of 6 datasets used in the analyses.  
(XLSX)

**S1 Table.** Farmer interview questions.  
(DOCX)

**S2 Table.** Full list of models used in the model selection procedure.  
(DOCX)

## Acknowledgments

We thank participating land managers, including the Earth Trust, Little Wittenham, and Joe Platt and Freya van Kesteren for water sample analysis. Eva Raebel provided helpful comments on earlier drafts. Thanks to APEM Ltd, Stockport, UK for invertebrate identification. We thank two anonymous reviewers and the editor for helpful comments on an earlier version of this paper.

## Author Contributions

Conceived and designed the experiments: REF RFS DWM. Performed the experiments: RFS. Analyzed the data: RFS PJJ. Wrote the paper: RFS REF PJJ DWM.

## References

1. Pereira M, Rodríguez A (2010) Conservation value of linear woody remnants for two forest carnivores in a Mediterranean agricultural landscape. *Journal of Applied Ecology* 47: 611–620.
2. Bradbury RB, Kirby WB (2006) Farmland birds and resource protection in the UK: Cross-cutting solutions for multi-functional farming? *Biological Conservation* 129: 530–542.
3. Rackham O (1986) *The History of the Countryside*. London: Phoenix Giant.
4. Herzon I, Helenius J (2008) Agricultural drainage ditches, their biological importance and functioning. *Biological Conservation* 141: 1171–1183.
5. Thiere G, Milenkovski S, Lindgren P-E, Sahlén G, Berglund O, Weisner SEB (2009) Wetland creation in agricultural landscapes: Biodiversity benefits on local and regional scales. *Biological Conservation* 142: 964–973.
6. Fox R, Brereton TM, Asher J, Botham MS, Middlebrook I, Roy DB, et al. (2011) *The State of the UK's Butterflies 2011*. Wareham, Dorset: Butterfly Conservation and the Centre for Ecology & Hydrology.
7. Smart SM, Firbank LG, Bunce RGH, Watkins JW (2000) Quantifying changes in abundance of food plants for butterfly larvae and farmland birds. *Journal of Applied Ecology* 37: 398–414.
8. Defra (2014) *Wild bird populations in England, 1970 to 2013, Annual Statistical Release*. London: Defra.

9. Baker DJ, Freeman SN, Grice PV, Siriwardena GM (2012) Landscape-scale responses of birds to agri-environment management: a test of the English Environmental Stewardship scheme. *Journal of Applied Ecology* 49: 871–882.
10. Kleijn D, Sutherland WJ (2003) How effective are European agri-environment schemes in conserving and promoting biodiversity? *Journal of Applied Ecology* 40: 947–969.
11. England Natural (2009) Agri-environment schemes in England 2009. A review of results and effectiveness. Peterborough: Natural England.
12. Sutherland WJ, Armstrong-Brown S, Armsworth PR, Brereton T, Brickland J, Campbell CD, et al. (2006) The identification of 100 ecological questions of high policy relevance in the UK. *Journal of Applied Ecology* 43: 617–627.
13. Merckx T, Marini L, Feber RE, Macdonald DW (2012) Hedgerow trees and extended-width field margins enhance macro-moth diversity: implications for management. *Journal of Applied Ecology* 49: 1396–1404.
14. Biggs J, Williams P, Whitfield M, Nicolet P, Brown C, Hollis J, et al. (2007) The freshwater biota of British agricultural landscapes and their sensitivity to pesticides. *Agriculture Ecosystems & Environment* 122: 137–148.
15. Manhoudt AGE, Udo de Haes HA, de Snoo GR (2005) An indicator of plant species richness of semi-natural habitats and crops on arable farms. *Agriculture, Ecosystems & Environment* 109: 166–174.
16. Williams P, Whitfield M, Biggs J, Bray S, Fox G, Nicolet P, et al. (2003) Comparative biodiversity of rivers, streams, ditches and ponds in an agricultural landscape in Southern England. *Biological Conservation* 115: 329–341.
17. Cushman SA (2006) Effects of habitat loss and fragmentation on amphibians: A review and prospectus. *Biological Conservation* 128: 231–240.
18. Van Geert A, Van Rossum F, Triest L (2010) Do linear landscape elements in farmland act as biological corridors for pollen dispersal? *Journal of Ecology* 98: 178–187.
19. Mauritzen M, Bergers PJM, Andreassen HP, Bussink H, Barendse R (1999) Root vole movement patterns: do ditches function as habitat corridors? *Journal of Applied Ecology* 36: 409–421.
20. Kröger R, Moore MT, Locke MA, Cullum RF, Steinriede RW, Testa S, et al. (2009) Evaluating the influence of wetland vegetation on chemical residence time in Mississippi Delta drainage ditches. *Agricultural Water Management* 96: 1175–1179.
21. European Union (2010) Introduction to the new EU Water Framework Directive. [http://ec.europa.eu/environment/water/water-framework/info/intro\\_en.htm](http://ec.europa.eu/environment/water/water-framework/info/intro_en.htm)
22. Avery LM (2012) Rural Sustainable Drainage Systems (RSuDS). Bristol: Environment Agency.
23. Sutherland WJ, Albon SD, Allison H, Armstrong-Brown S, Bailey MJ, Brereton T, et al. (2010) The identification of priority policy options for UK nature conservation. *Journal of Applied Ecology* 47: 955–965.
24. Twisk W, Noordervliet MAW, ter Keurs WJ (2000) Effects of ditch management on caddisfly, dragonfly and amphibian larvae in intensively farmed peat areas. *Aquatic Ecology* 34: 397–411.
25. Milsom TP, Sherwood AJ, Rose SC, Town SJ, Runham SR (2004) Dynamics and management of plant communities in ditches bordering arable fenland in eastern England. *Agriculture, Ecosystems & Environment* 103: 85–99.
26. Drake CM, Stewart NF, Palmer MA, Kindemba VL (2010) The ecological status of ditch systems: an investigation into the current status of the aquatic invertebrate and plant communities of grazing marsh ditch systems in England and Wales. Technical Report. Peterborough: Buglife.
27. Leng X, Musters CJM, de Snoo GR (2009) Restoration of plant diversity on ditch banks: Seed and site limitation in response to agri-environment schemes. *Biological Conservation* 142: 1340–1349.
28. Manhoudt AGE, Visser AJ, de Snoo GR (2007) Management regimes and farming practices enhancing plant species richness on ditch banks. *Agriculture, Ecosystems & Environment* 119: 353–358.
29. van Dijk WFA, Ruijven Jv, Berendse F, Snoo GR (2014) The effectiveness of ditch banks as dispersal corridor for plants in agricultural landscapes depends on species' dispersal traits. *Biological Conservation* 171: 91–98.
30. Jenkins KM, Boulton AJ (2003) Connectivity in a dryland river: Short-term aquatic microinvertebrate recruitment following floodplain inundation. *Ecology* 84: 2708–2723.
31. Boulton AJ, Lake PS (1992) The ecology of two intermittent streams in Victoria, Australia. 3. Temporal changes in faunal composition. *Freshwater Biology* 27: 123–138.
32. Kraft CE, Sullivan PJ, Karatayev AY, Burlakova YE, Nekola JC, Johnson LE, et al. (2002) Landscape patterns of an aquatic invader: Assessing dispersal extent from spatial distributions. *Ecological Applications* 12: 749–759.

33. Manhoudt AGE, de Snoo GR (2003) A quantitative survey of semi-natural habitats on Dutch arable farms. *Agriculture Ecosystems & Environment* 97: 235–240.
34. Verdonchot RCM, Keizer-vlek HE, Verdonchot PFM (2011) Biodiversity value of agricultural drainage ditches: a comparative analysis of the aquatic invertebrate fauna of ditches and small lakes. *Aquatic Conservation: Marine and Freshwater Ecosystems* 21: 715–727.
35. Foster GN, Foster AP, Eyre MD, Bilton DT (1989) Classification of water beetle assemblages in arable fenland and ranking of sites in relation to conservation value. *Freshwater Biology* 22: 343–354.
36. Painter D (1999) Macroinvertebrate Distributions and the Conservation Value of Aquatic Coleoptera, Mollusca and Odonata in the Ditches of Traditionally Managed and Grazing Fen at Wicken Fen, UK. *Journal of Applied Ecology* 36: 33–48.
37. Pavelis GA (1987) *Farm Drainage in the United States: History, Status, and Prospects*. Washington, D. C.: USDA Economic Research Service.
38. Brown CD, Turner N, Hollis J, Bellamy P, Biggs J, Williams P, et al. (2006) Morphological and physico-chemical properties of British aquatic habitats potentially exposed to pesticides. *Agriculture Ecosystems & Environment* 113: 307–319.
39. England Natural (2010) *Entry Level Stewardship: Environmental Stewardship Handbook*. Peterborough: Natural England.
40. Leng X, Musters CJM, de Snoo GR (2011) Spatiotemporal variation of plant diversity on ditch banks under different management regimes. *Basic and Applied Ecology* 12: 38–46.
41. Armitage PD, Lattmann K, Kneebone N, Harris I (2001) Bank profile and structure as determinants of macroinvertebrate assemblages-seasonal changes and management. *Regulated Rivers: Research & Management* 17: 543–556.
42. Janse JH, Van Puijenbroek PJTM (1998) Effects of eutrophication in drainage ditches. *Environmental Pollution* 102: 547–552.
43. Palmer M, Drake M, Stewart N (2010) *A manual for the survey and evaluation of the aquatic plant and invertebrate assemblages of ditches, Version 4*. Peterborough: Buglife.
44. Stace C (1997) *New flora of the British Isles*. Cambridge: Cambridge University Press.
45. Biggs J (2008) *A standard Water Framework Directive compliant method for surveying macroinvertebrate assemblages in ditches*. Oxford: Pond Conservation.
46. Agency Environment, Action Pond (2002) *A guide to monitoring the ecological quality of ponds and canals using PSYM*. Peterborough: Environment Agency.
47. Berger WH, Parker FL (1970) Diversity of planktonic foraminifera in deep-sea sediments. *Science* 168: 1345–1347. PMID: [17731043](#)
48. Pinheiro P, Bates D, DebRoy S, Sarkar D, R Development Core Team (2012) nlme: Linear and Nonlinear Mixed Effects Models. R package version 3.1–103.
49. R Development Core Team (2012) R: A language and environment for statistical computing. Vienna, Austria. ISBN 3-900051-07-0, URL <http://www.R-project.org/>. R Foundation for Statistical Computing.
50. Bates D, Maechler M, Bolker B (2011) lme4: Linear mixed-effects models using Eigen and Eigen. R package version 0.999375–42. <http://CRAN.R-project.org/package=lme4>.
51. Anderson DR (2008) *Model Based Inference in the Life Sciences: A Primer on Evidence*. New York: Springer.
52. Bartoń K (2013) MuMIn: multi-model inference, R package version 1.9.13.
53. Nagelkerke NJD (1991) A note on a general definition of the coefficient of determination. *Biometrika* 78: 691–692.
54. Oksanen J, Blanchet FG, Kindt R, Legendre P, Minchin PR, O'Hara RB, et al. (2012) vegan: Community Ecology Package: R package version 2.0–3. <http://CRAN.R-project.org/package=vegan>.
55. Borcard D, Gillet F, Legendre P (2011) *Numerical ecology with R*. New York: Springer.
56. Otyrkova Z, Chytrý M (2006) Effects of plot size on the ordination of vegetation samples. *Journal of Vegetation Science* 17: 465–472.
57. Blanchet FG, Legendre P, Borcard D (2008) Forward selection of explanatory variables. *Ecology* 89: 2623–2632. PMID: [18831183](#)
58. Peres-Neto PR, Legendre P, Dray S, Borcard D (2006) Variation partitioning of species data matrices: Estimation and comparison of fractions. *Ecology* 87: 2614–2625. PMID: [17089669](#)
59. Davies B, Biggs J, Williams P, Whitfield M, Nicolet P, Sear D, et al. (2008) Comparative biodiversity of aquatic habitats in the European agricultural landscape. *Agriculture, Ecosystems & Environment* 125: 1–8.

60. Leslie AW, Smith RF, Ruppert DE, Bejleri K, McGrath JM, Needelman BA, et al. (2012) Environmental Factors Structuring Benthic Macroinvertebrate Communities of Agricultural Ditches in Maryland. *Environmental Entomology* 41: 802–812.
61. Buisson RSK, Wade PM, Cathcart RL, Hemmings SM, Manning CJ, Mayer L (2008) *The Drainage Channel Biodiversity Manual: Integrating Wildlife and Flood Risk Management*. Peterborough: Association of Drainage Authorities and Natural England.
62. Dideren K, Verdonshot RCM, Verdonshot PFM (2008) Addition of wood to streams: experiences from a lowland stream restoration project. 6th European Conference on Ecological Restoration. Ghent, Belgium: Alterra.
63. Twisk W, Noordervliet MAW, ter Keurs WJ (2003) The nature value of the ditch vegetation in peat areas in relation to farm management. *Aquatic Ecology* 37: 191–209.
64. Aquilina R, Williams P, Nicolet P (2007) Effect of wetting-up ditches on emergent insect numbers. *Aspects of Applied Biology* 81: 261–262.
65. Blann K, Nerbonne JF, Vondracek B (2002) Relationship of riparian buffer type to water temperature in the driftless area ecoregion of Minnesota. *North American Journal of Fisheries Management* 22: 441–451.
66. van Liere L, Janse JH, Jeuken M, Van Puijenbroek PJTM, Schoumans O, Hendricks R, et al. (2002) Effect of nutrient loading on surface waters in polder Bergambacht, The Netherlands. *Agricultural Effects on Ground and Surface Waters: Research at the Edge of Science and Society*. Wageningen: IAHS.
67. RSPB (2007) *Wetting up farmlands for birds and other biodiversity*. Defra Project Report BD1312. London: Defra.
68. Grime JP (1973) Competitive exclusion in herbaceous vegetation. *Nature* 242: 344–347.
69. Connell JH (1978) Diversity in tropical rainforests and coral reefs—high diversity of trees and corals is maintained only in a non-equilibrium state. *Science* 199: 1302–1310.
70. Mackey RL, Currie DJ (2001) The diversity-disturbance relationship: Is it generally strong and peaked? *Ecology* 82: 3479–3492.
71. Smith DR, Pappas EA (2007) Effect of ditch dredging on the fate of nutrients in deep drainage ditches of the Midwestern United States. *Journal of Soil and Water Conservation* 62: 252–261.
72. Mountford JO, Arnold H (2006) *Aquatic Plant Diversity in Arable Ditches: Scoping Study*. Monks Wood: CEH.
73. Russell MA, Walling DE, Hodgkinson RA (2001) Suspended sediment sources in two small lowland agricultural catchments in the UK. *Journal of Hydrology* 252: 1–24.
74. van Dijk WFA, Schaffers AP, Leewis L, Berendse F, de Snoo GR (2013) Temporal effects of agri-environment schemes on ditch bank plant species. *Basic and Applied Ecology* 14: 289–297.
75. Blomqvist MM, Tamis WLM, de Snoo GR (2009) No improvement of plant biodiversity in ditch banks after a decade of agri-environment schemes. *Basic and Applied Ecology* 10: 368–378.
76. Boatman N, Jones N, Garthwaite D, Bishop J, Pietravalle S, Harrington P, et al. (2007) *Evaluation of the Operation of Environmental Stewardship*. London: Final report to Defra, (project MA01028).
77. McLaren R, Riding A, Lyons-Visser H (2002) *The Effectiveness of Ditch Management for Wildlife in the Broads and Somerset Levels & Moors ESAs*. ADAS.
78. Food and Environment Research Agency (2012) *Ecosystem services from Environmental Stewardship that benefit agricultural production: Natural England Commissioned Reports, Number 102*.
79. Morris JT, Sundareshwar PV, Nietch CT, Kjerfve B, Cahoon DR (2002) Responses of Coastal Wetlands to Rising Sea Level. *Ecology* 83: 2869–2877.
